# Supplementary material
Source: Springer Nature journal article supplement (https://www.springermedizin.de/resource/supplementary/12885_2013_4692_MOESM11_ESM.pdf/9467058)

**IDH1 Mutation  
Positive**

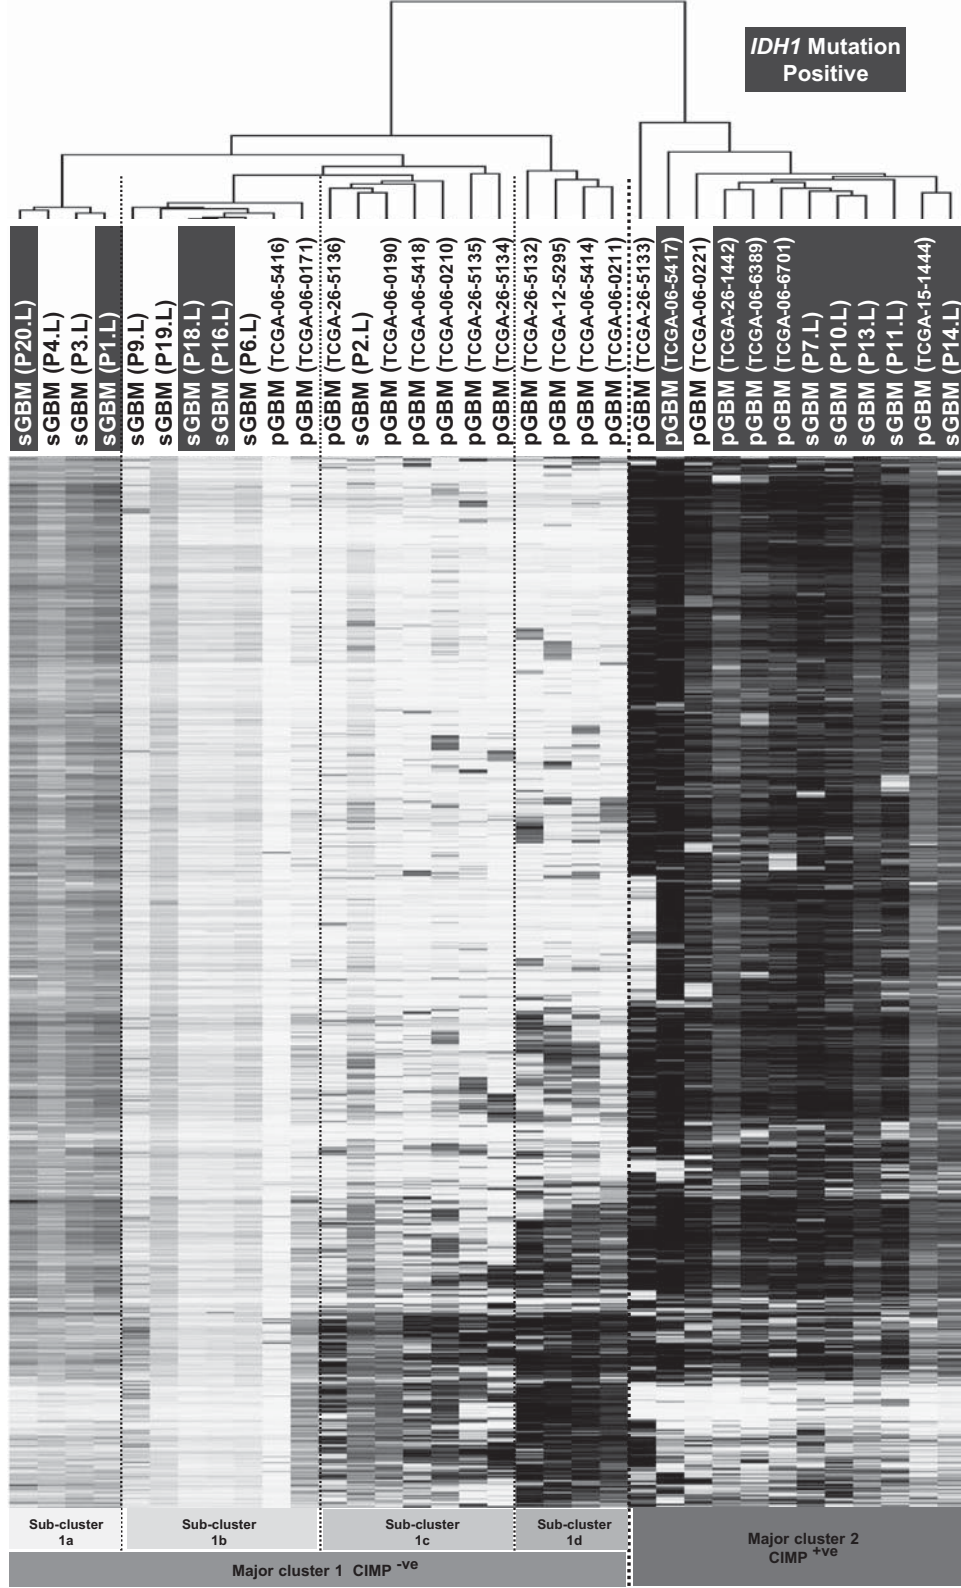

Supplement: MOESM11 [file 9467058]
